# Supplementary material for: Empowering Young Women: A Qualitative Co-Design Study of a Social Media Health Promotion Programme
Source: MDPI journal article supplement (doi:10.3390/nu16060780), 2024-03-09

# THE DAILY HEALTH COACH CO-DESIGN CONCEPT MAP

## Research Question One

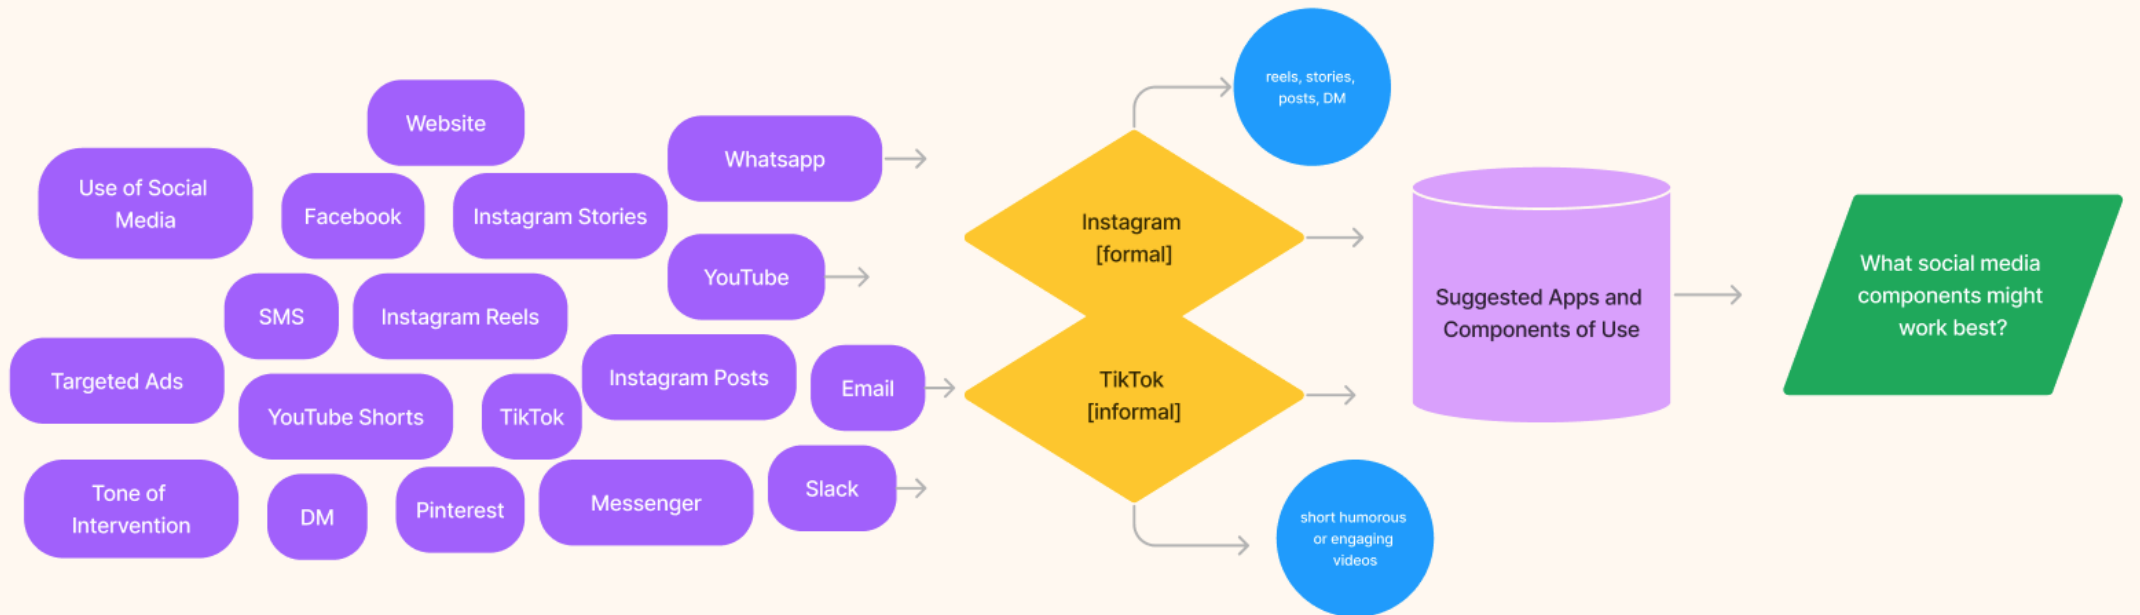

# THE DAILY HEALTH COACH CO-DESIGN CONCEPT MAP

## Research Question Two

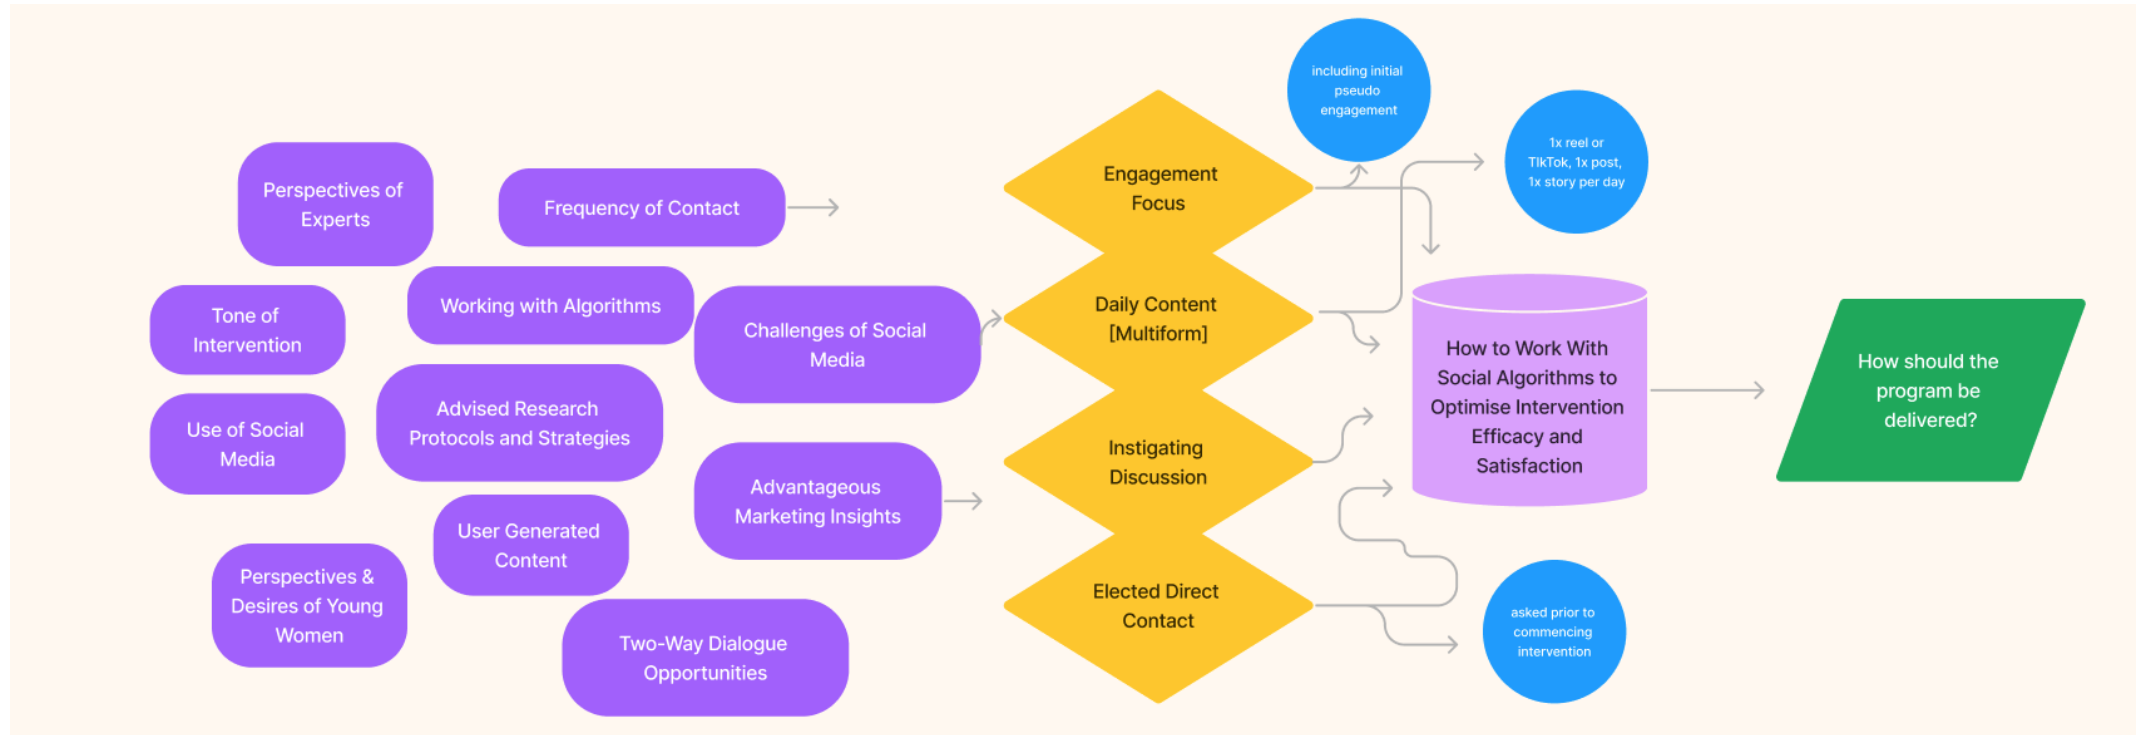

# THE DAILY HEALTH COACH CO-DESIGN CONCEPT MAP

## Research Question Three

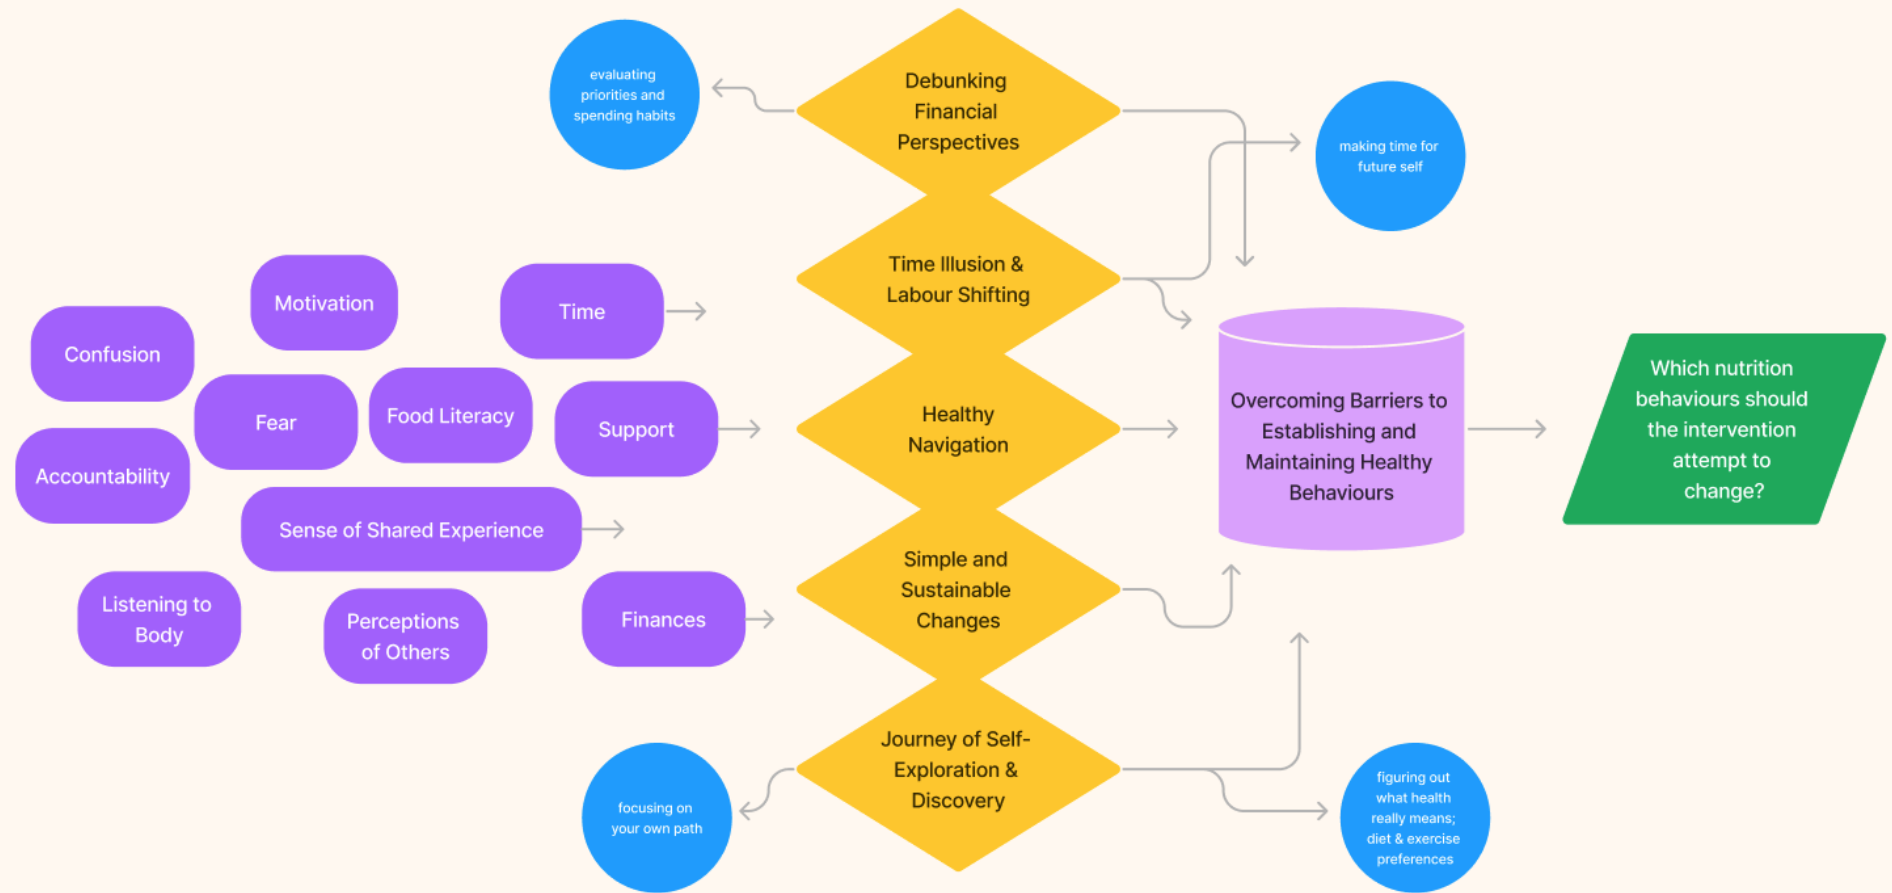

# THE DAILY HEALTH COACH CO-DESIGN CONCEPT MAP

## Research Question Three

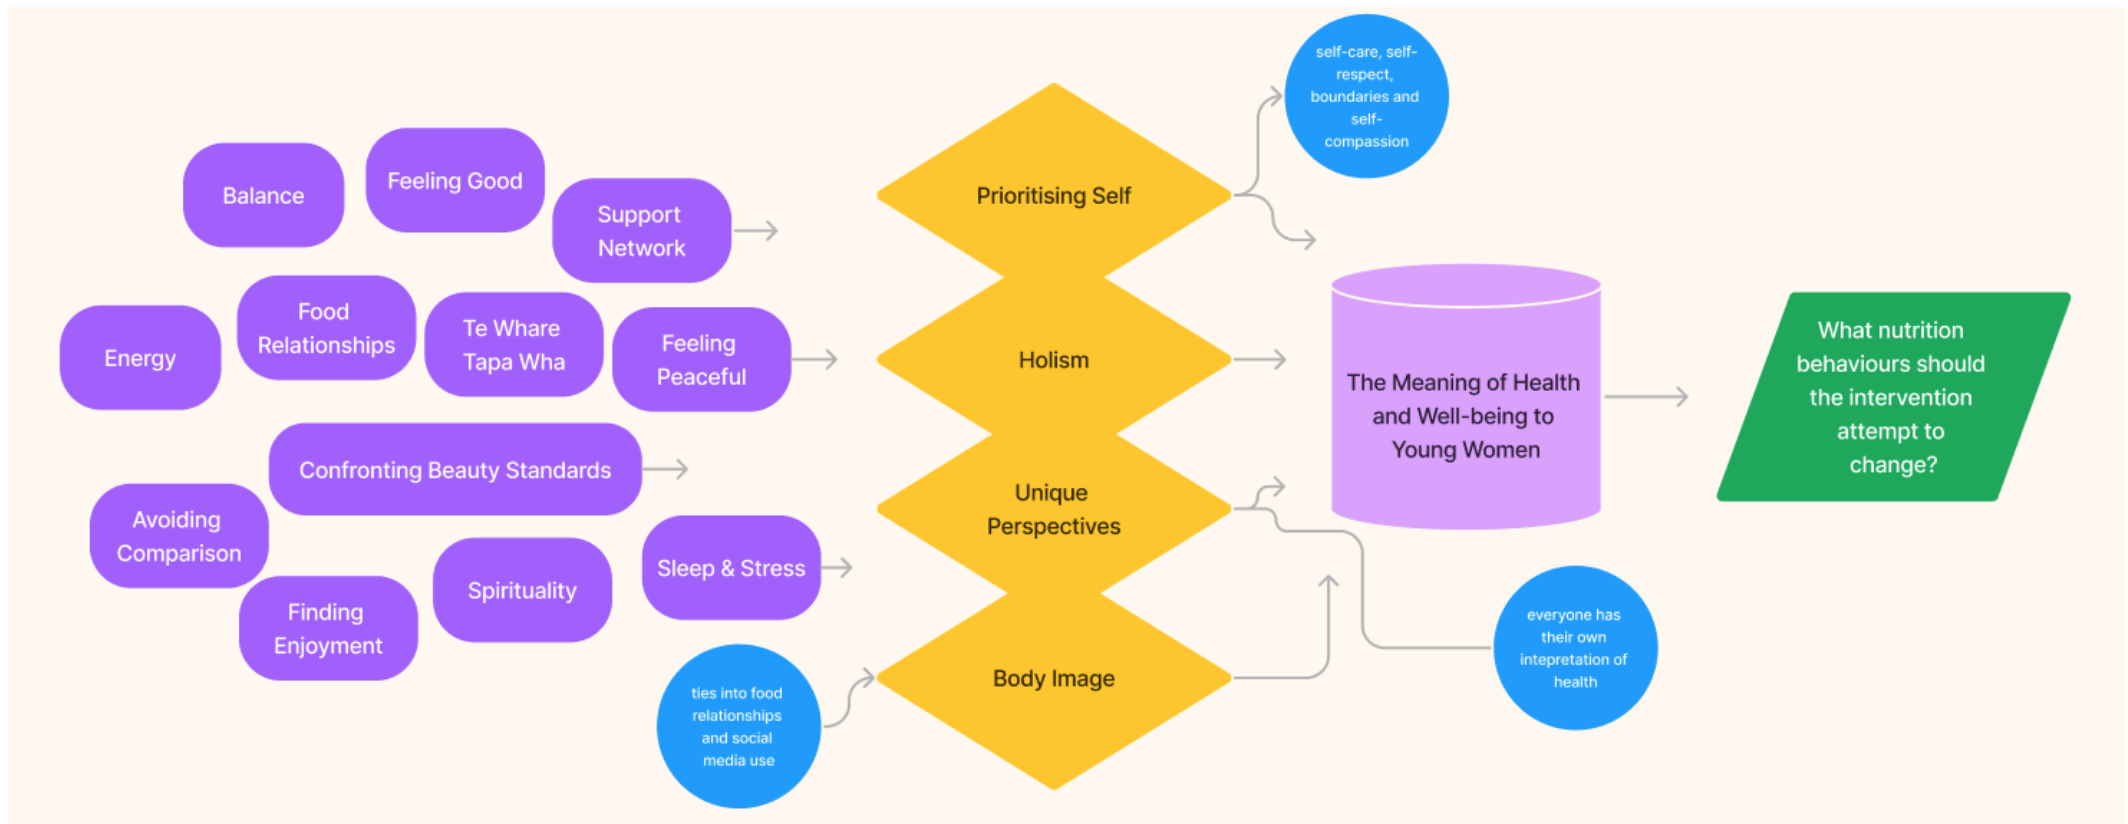

# THE DAILY HEALTH COACH CO-DESIGN CONCEPT MAP

## Research Question Four

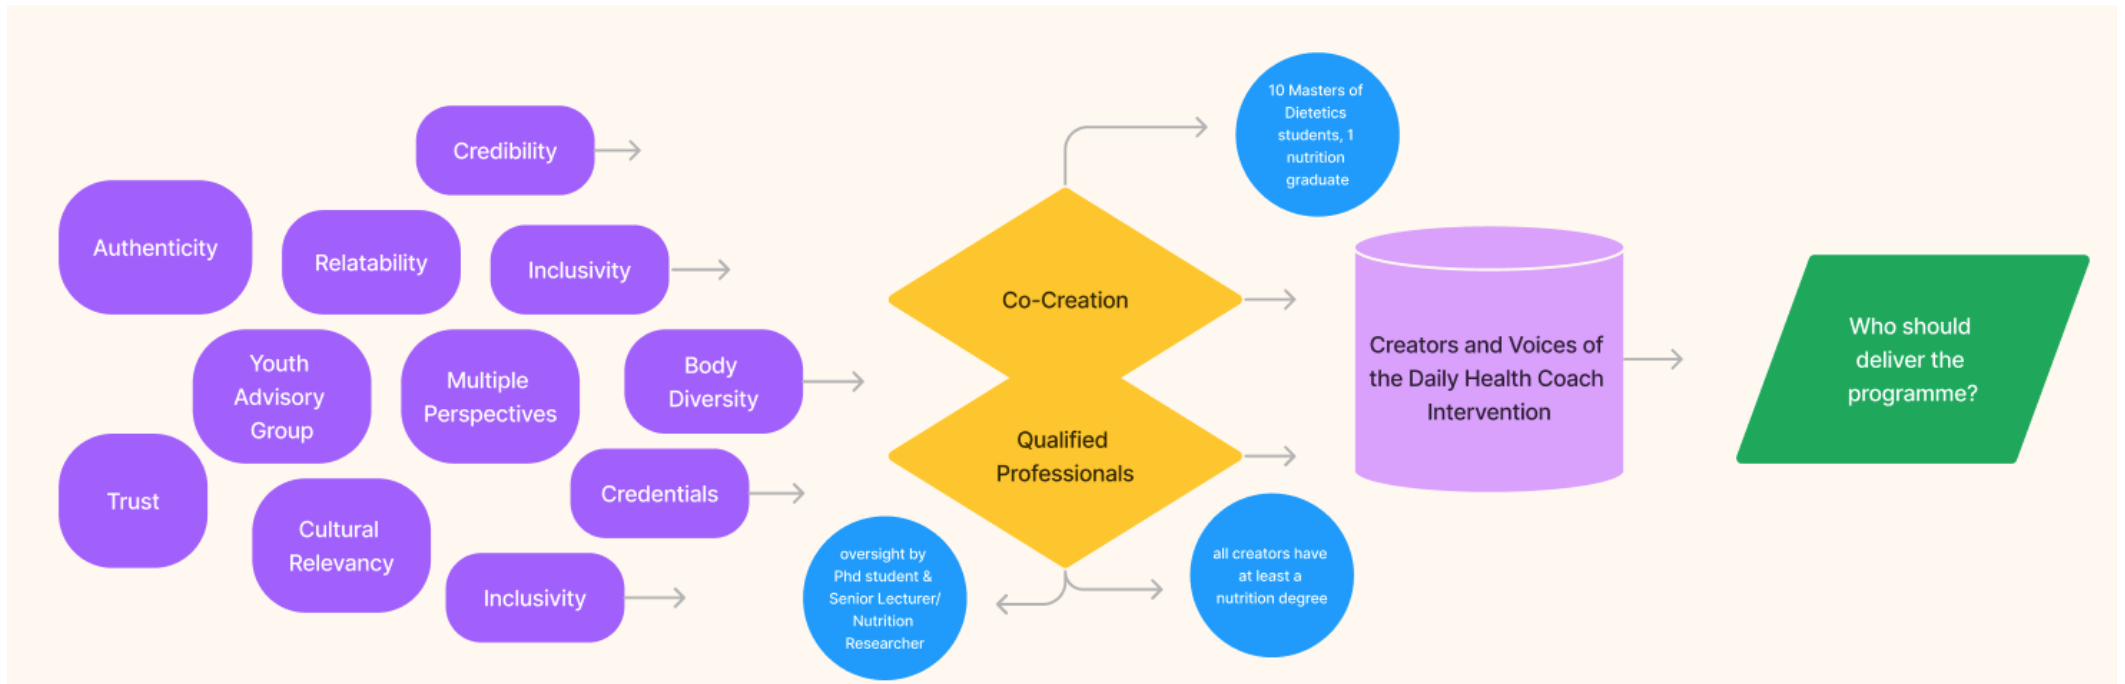

## Legend

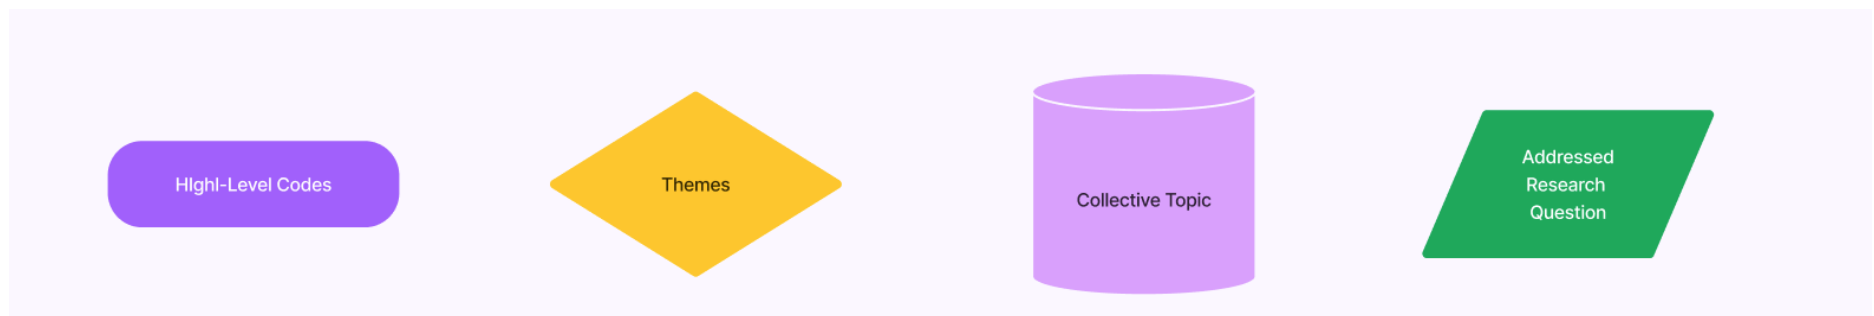

Supplement: s1 [file s1]
